# Supplementary material for: Surface-functionalized palladium catalysts for electrochemical CO2 reduction
Source: Royal Society of Chemistry journal article supplement (doi:10.1039/d0ta03427d), 2020-01-01
Supplement: d0ta03427d1.pdf [file d0ta03427d1.pdf]

# Supporting Information

## Surface-modified Pd/C catalysts for Electrochemical CO<sub>2</sub> Reduction

Rong Xia<sup>ab</sup>, Sheng Zhang<sup>\*a</sup>, Xinbin Ma<sup>a</sup>, Feng Jiao<sup>\*b</sup>

Affiliations:

<sup>a</sup>Key Laboratory for Green Chemical Technology of Ministry of Education, Collaborative Innovation Center of Chemical Science and Engineering, School of Chemical Engineering and Technology, Tianjin University, Tianjin 300072, China

<sup>b</sup>Center for Catalytic Science and Technology, Department of Chemical and Biomolecular Engineering, University of Delaware, Newark, Delaware 19716, United States

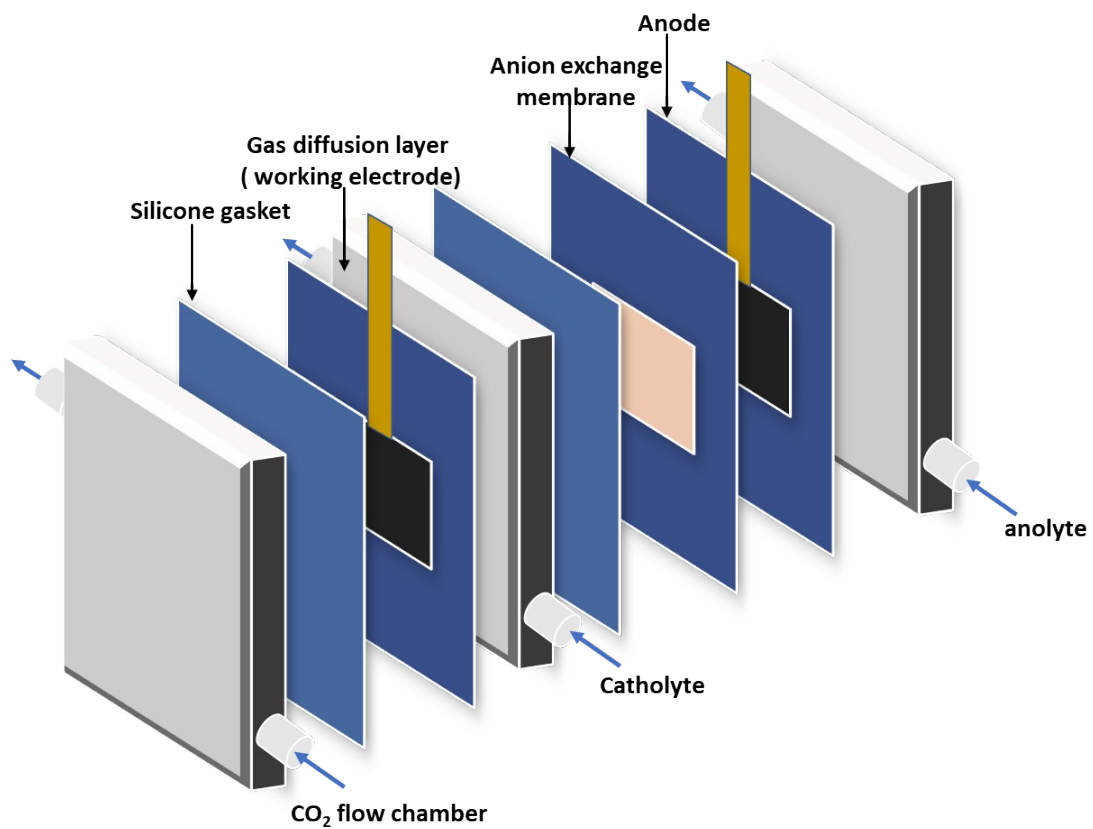

Figure S1: A schematic diagram of 3-compartment microfluidic flow cell configuration.

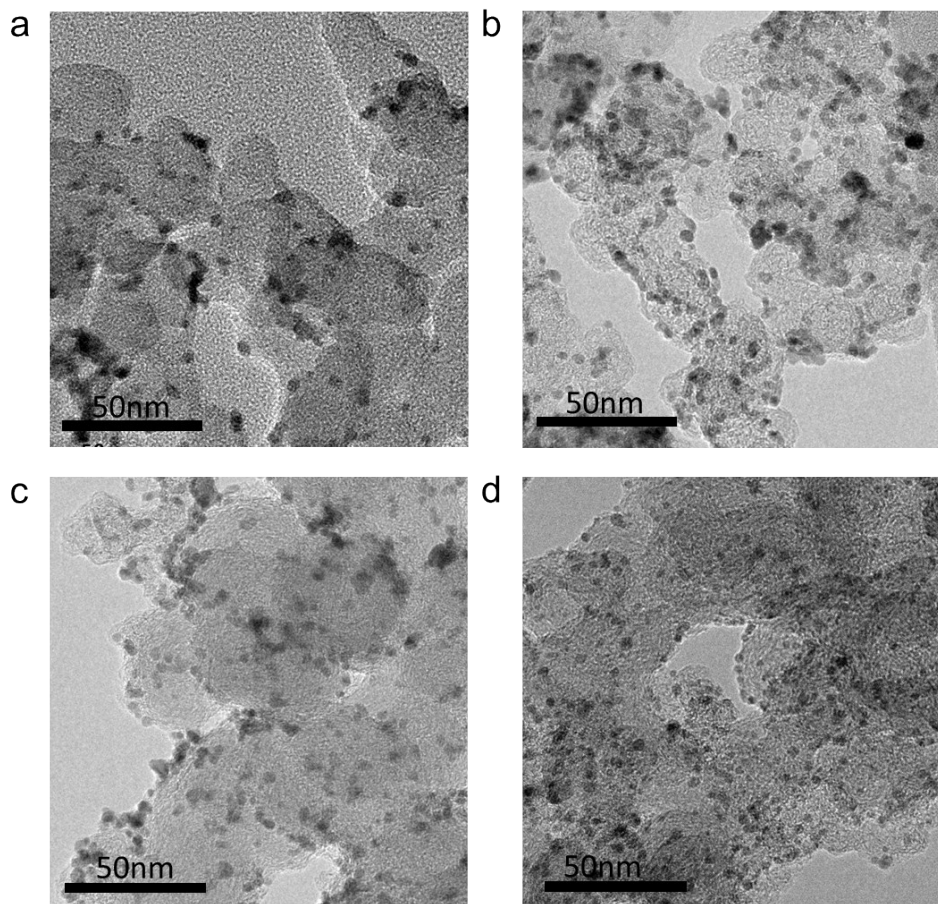

Figure S2: Transition electron microscope (TEM) images of Pd/C-PDDA-X. (a) Pd/C-PDDA-0; (b) Pd/C-PDDA-10; (c) Pd/C-PDDA-20 and (d) Pd/C-PDDA-40.

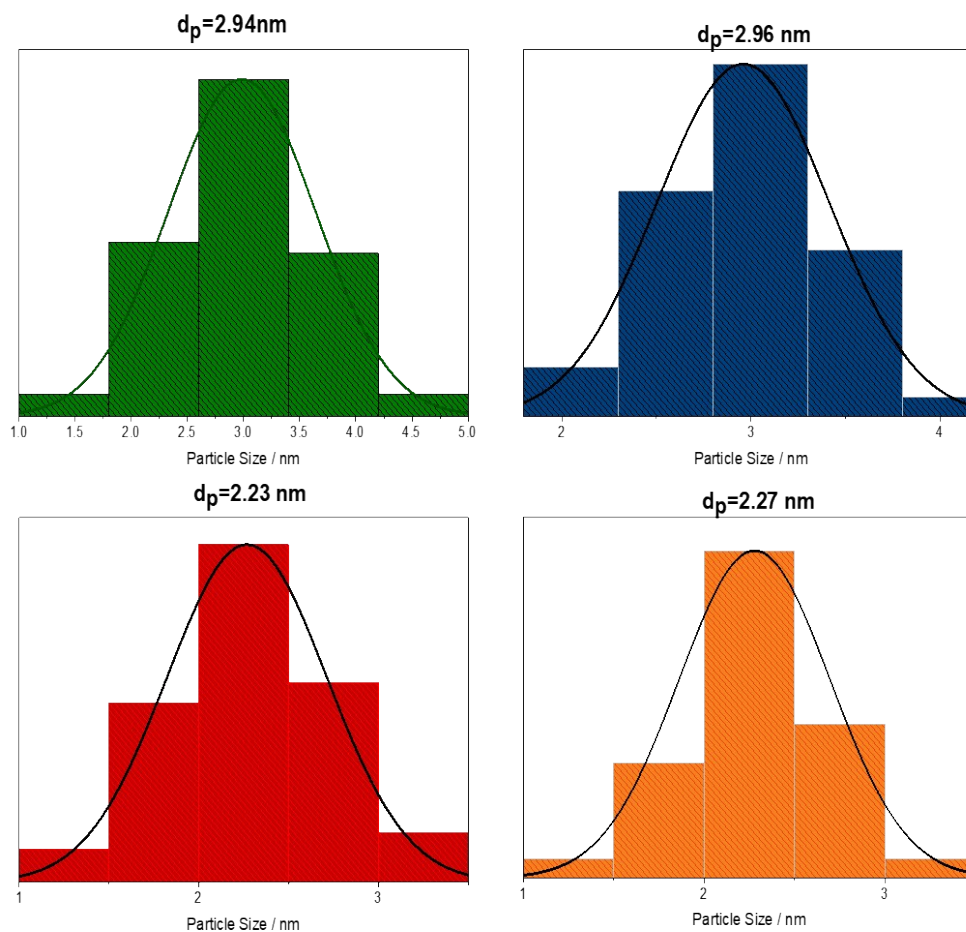

Figure S3: Particle size distribution histograms of (a) Pd/C-PDDA-0, (b) Pd/C-PDDA-10, (c) Pd/C-PDDA-20 and (d) Pd/C-PDDA-40.

Table S1: Pd loading determined by Inductively Coupled Plasma Optical Emission

| Sample       | Pd theoretical loading / wt.% | Pd practical loading / wt.% |
|--------------|-------------------------------|-----------------------------|
| Pd/C-PDDA-0  | 20                            | 19.3                        |
| Pd/C-PDDA-10 | 20                            | 19.7                        |
| Pd/C-PDDA-20 | 20                            | 19.6                        |
| Pd/C-PDDA-40 | 20                            | 19.8                        |

Spectroscopy analysis (ICP-OES).

Table S2: Mean particle size of different Pd/C-PDDA catalysts.

| Sample       | Particle size / nm |
|--------------|--------------------|
| Pd/C-PDDA-0  | 3.0                |
| Pd/C-PDDA-10 | 2.9                |
| Pd/C-PDDA-20 | 2.5                |
| Pd/C-PDDA-40 | 2.6                |

$$D = \frac{K\lambda}{\beta \cos\theta} \quad (\text{Eq. S1})$$

D is the mean size of the ordered crystalline domains;

K is the dimensionless shape factor;

$\lambda$  is the wavelength of X-ray;

$\beta$  is the subtraction of line broadening at full width at half maximum (FWHM) from the instrumental line broadening;

$\theta$  is the Bragg angle.
